# Supplementary material
Source: PubMed Central journal article supplement (PMC9245964)
Supplement: 7945_Appendix.pdf [file 7945_Appendix.pdf]

**APPENDIX**

**Supplementary Figure 1.** Overview of initial survey results for each stage-specific topic.

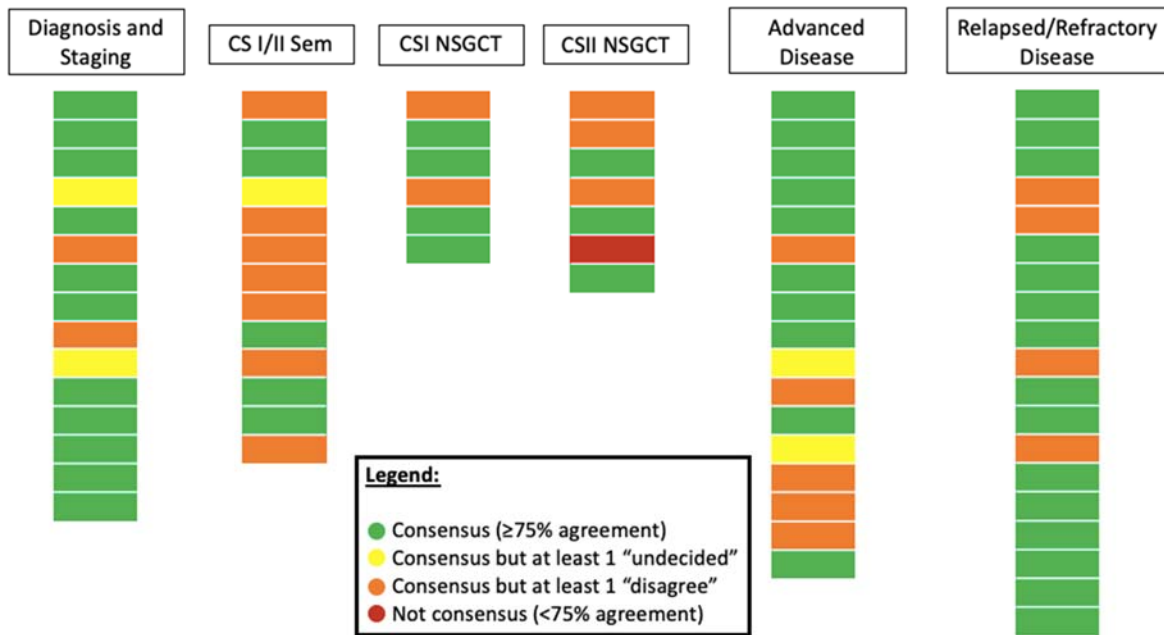

**Supplementary Figure 2.** Schema for the management of stage I seminoma (CS1). BEP: bleomycin, etoposide, cisplatin; IGCCC: International Germ Cell Cancer Collaborative Group.

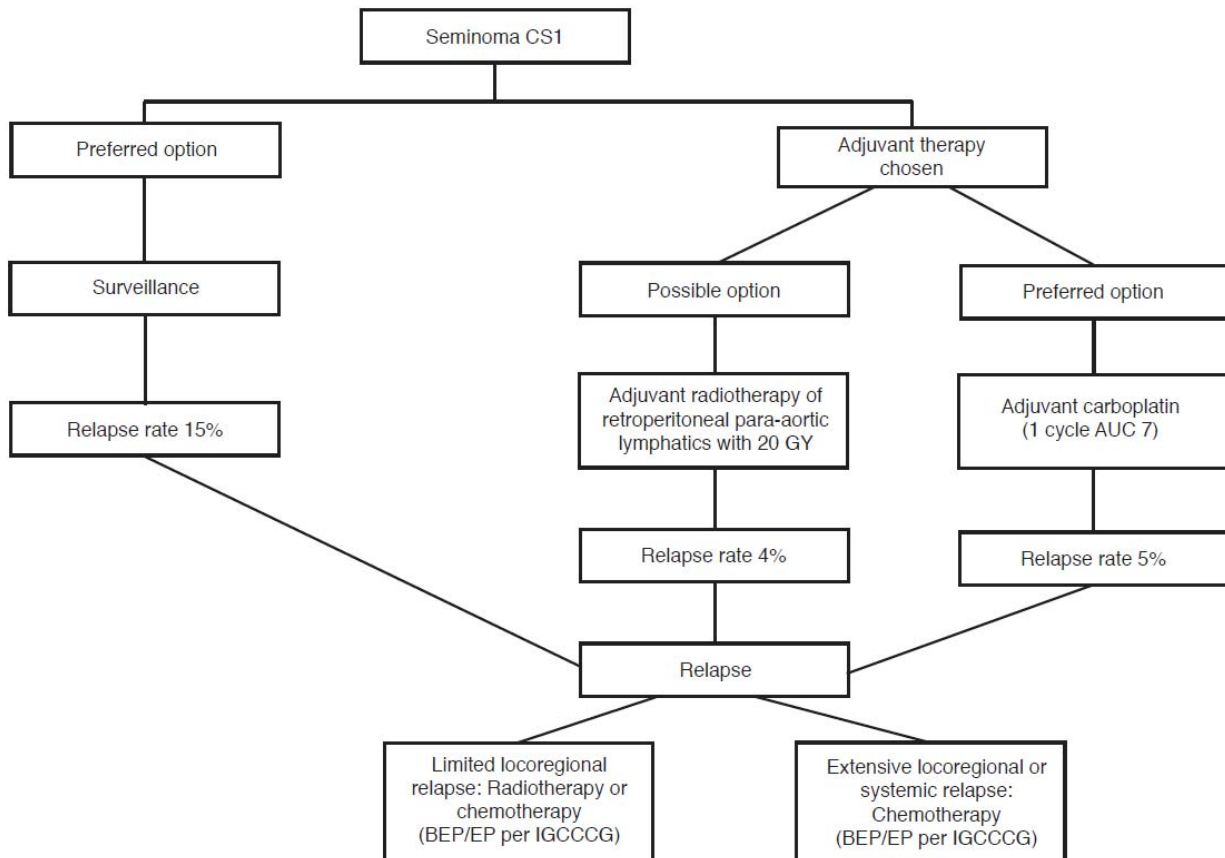

**Supplementary Figure 3.** Schema for the management of stage I non-seminoma (CS1). IGCCC: International Germ Cell Cancer Collaborative Group; RPLND: retroperitoneal lymph node dissection.

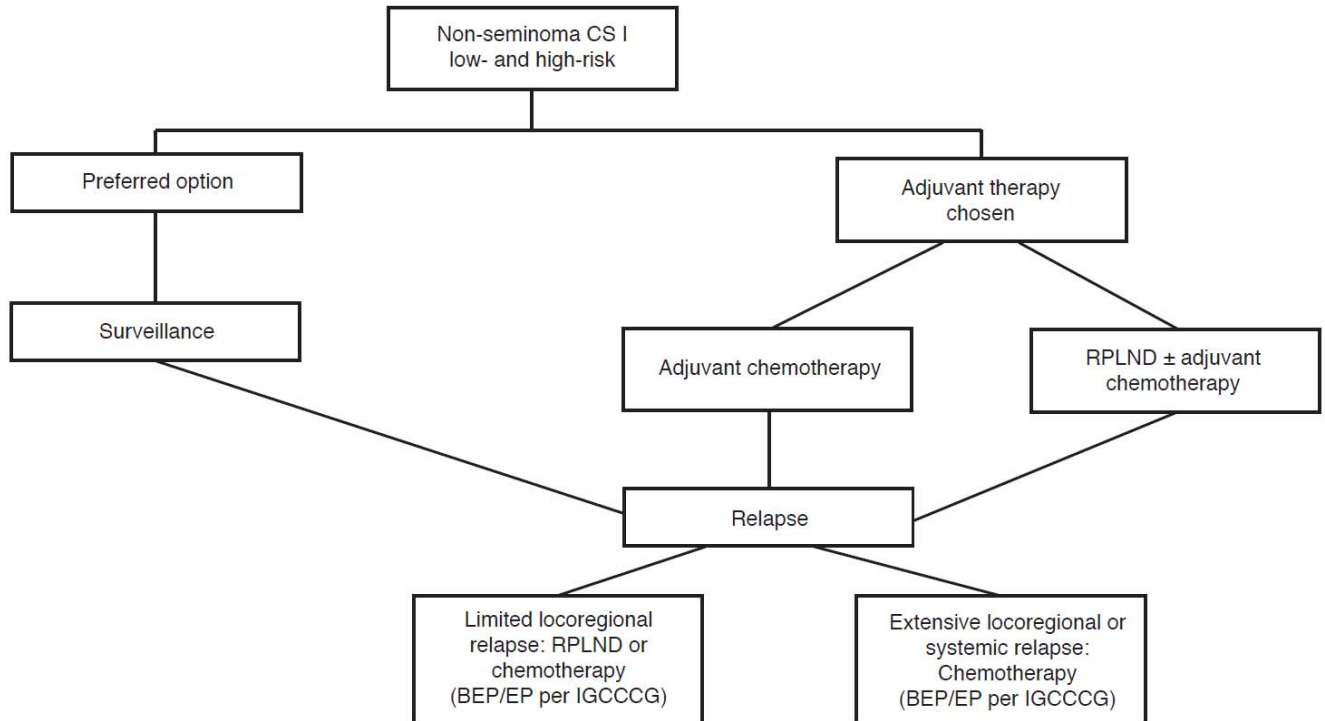

| <b>Supplementary Table 1. Staging of testis tumors: UICC/American Joint Committee on Cancer (8th edition)<sup>1</sup></b> |             |                                                                                                                                                               |
|---------------------------------------------------------------------------------------------------------------------------|-------------|---------------------------------------------------------------------------------------------------------------------------------------------------------------|
| <b>TNM staging</b>                                                                                                        | <b>Unit</b> | <b>Value</b>                                                                                                                                                  |
| <b>Primary tumor (pT)</b>                                                                                                 | pTX         | Primary tumor cannot be assessed                                                                                                                              |
|                                                                                                                           | pT0         | No evidence of primary tumor                                                                                                                                  |
|                                                                                                                           | pTis        | Germ cell neoplasia in situ                                                                                                                                   |
|                                                                                                                           | pT1         | Tumor limited to testis (including rete testis invasion) without lymphovascular invasion                                                                      |
|                                                                                                                           | pT1a        | Tumor smaller than 3 cm in size <sup>#</sup>                                                                                                                  |
|                                                                                                                           | pT1b        | Tumor 3 cm or larger in size <sup>#</sup>                                                                                                                     |
|                                                                                                                           | pT2         | Tumor limited to the testis (including rete testis invasion) with lymphovascular invasion OR<br>Tumor invading hilar soft tissue or epididymis or penetrating |

*Hamilton RJ, et al. Canadian Urological Association consensus guideline: Management of testicular germ cell cancer*

|                                         |     |                                                                                                                                                                                                          |     |                                                                                                                                                                       |
|-----------------------------------------|-----|----------------------------------------------------------------------------------------------------------------------------------------------------------------------------------------------------------|-----|-----------------------------------------------------------------------------------------------------------------------------------------------------------------------|
|                                         |     | visceral mesothelial layer covering the external surface of tunica albuginea with or without lymphovascular invasion                                                                                     |     |                                                                                                                                                                       |
|                                         | pT3 | Tumor directly invades spermatic cord soft tissue with or without lymphovascular invasion                                                                                                                |     |                                                                                                                                                                       |
|                                         | pT4 | Tumor invades scrotum with or without lymphovascular invasion                                                                                                                                            |     |                                                                                                                                                                       |
| <b>Regional lymph nodes (pN and cN)</b> | NX  | Regional lymph node cannot be assessed                                                                                                                                                                   |     |                                                                                                                                                                       |
|                                         | pN0 | No regional lymph node metastasis                                                                                                                                                                        | cN0 | No regional lymph node metastasis                                                                                                                                     |
|                                         | pN1 | Metastasis with a lymph node mass 2 cm or smaller in greatest dimension and less than or equal to five nodes positive, none larger than 2 cm in greatest dimension                                       | cN1 | Metastasis with a lymph node mass $\leq 2$ cm in greatest dimension OR multiple lymph nodes, none $> 2$ cm in greatest dimension                                      |
|                                         | pN2 | Metastasis with a lymph node mass larger than 2 cm but not larger than 5 cm in greatest dimension; or more than five nodes positive, none larger than 5 cm; or evidence of extranodal extension of tumor | cN2 | Metastasis with a lymph node mass $> 2$ cm but $\leq 5$ cm in greatest dimension OR multiple lymph nodes, any one mass $> 2$ cm but $\leq 5$ cm in greatest dimension |
|                                         | pN3 | Metastasis with a lymph node mass larger than 5 cm in greatest dimension                                                                                                                                 | cN3 | Metastasis with a lymph node mass $> 5$ cm in greatest dimension                                                                                                      |
| <b>Distant metastasis (M)</b>           | M1  | Distant metastasis                                                                                                                                                                                       |     |                                                                                                                                                                       |
|                                         | M1a | Non-retroperitoneal nodal or pulmonary metastases                                                                                                                                                        |     |                                                                                                                                                                       |
|                                         | M1b | Non-pulmonary visceral metastases                                                                                                                                                                        |     |                                                                                                                                                                       |
| <b>Serum tumor markers (S)</b>          | SX  | Serum marker studies not available or performed                                                                                                                                                          |     |                                                                                                                                                                       |
|                                         | S0  | Marker study levels within normal limits                                                                                                                                                                 |     |                                                                                                                                                                       |

*Hamilton RJ, et al. Canadian Urological Association consensus guideline: Management of testicular germ cell cancer*

|                       |              |                                                                          |                   |                     |
|-----------------------|--------------|--------------------------------------------------------------------------|-------------------|---------------------|
|                       | S1           | LDH <1.5 × normal and HCG (IU/L) <5000 and AFP (ug/mL) <1000             |                   |                     |
|                       | S2           | LDH 1.5–10 × normal or HCG (IU/L) 5000–50 000 or AFP (ug/mL) 1000–10 000 |                   |                     |
|                       | S3           | LDH >10 × normal or HCG (IU/L) >50 000 or AFP (ug/mL) >10 000            |                   |                     |
| <b>Stage grouping</b> |              |                                                                          |                   |                     |
| <b>Stage</b>          | <b>Tumor</b> | <b>Node</b>                                                              | <b>Metastasis</b> | <b>Serum factor</b> |
| 0                     | pTis         | N0                                                                       | M0                | S0                  |
| I                     | pT1-4        | N0                                                                       | M0                | SX                  |
| IA                    | pT1          | N0                                                                       | M0                | S0                  |
| IB                    | pT2          | N0                                                                       | M0                | S0                  |
|                       | pT3          |                                                                          | M0                | S0                  |
|                       | pT4          |                                                                          | M0                | S0                  |
| IS                    | Any T        | N0                                                                       | M0                | S1-3                |
| II                    | Any T        | N1-3                                                                     | M0                | SX                  |
| IIA                   | Any T        | N1                                                                       | M0                | S0                  |
|                       | Any T        | N1                                                                       | M0                | S1                  |
| IIB                   | Any T        | N2                                                                       | M0                | S0                  |
|                       | Any T        | N2                                                                       | M0                | S1                  |
| IIC                   | Any T        | N3                                                                       | M0                | S0                  |
|                       | Any T        | N3                                                                       | M0                | S1                  |
| III                   | Any T        | Any N                                                                    | M1                | SX                  |
| IIIA                  | Any T        | Any N                                                                    | M1a               | S0                  |
|                       | Any T        | Any N                                                                    | M1a               | S1                  |
| IIIB                  | Any T        | N1-3                                                                     | M0                | S2                  |
|                       | Any T        | Any N                                                                    | M1a               | S2                  |
| IIIC                  | Any T        | N1-3                                                                     | M0                | S3                  |
|                       | Any T        | Any N                                                                    | M1a               | S3                  |
|                       | Any T        | Any N                                                                    | M1b               | Any S               |

#Subclassification of pT1 applies only to pure seminoma. AFP: alpha-fetoprotein; HCG: human chorionic gonadotrophin; LDH: lactate dehydrogenase.

*Hamilton RJ, et al. Canadian Urological Association consensus guideline: Management of testicular germ cell cancer*

| <b>Supplementary Table 2. Summary of surveillance studies in stage I seminoma</b> |             |                                 |                     |                             |                  |                                  |
|-----------------------------------------------------------------------------------|-------------|---------------------------------|---------------------|-----------------------------|------------------|----------------------------------|
| <b>Author</b>                                                                     | <b>Year</b> | <b>Median followup (months)</b> | <b>No. patients</b> | <b>No. patients relapse</b> | <b>Relapse %</b> | <b>Cause-specific survival %</b> |
| Ramakrishnan <sup>2</sup>                                                         | 1992        | 44                              | 72                  | 13                          | 18               | 100                              |
| Von der Maase <sup>3</sup>                                                        | 1993        | 48                              | 261                 | 49                          | 18.8             | 98.9                             |
| Warde <sup>4</sup>                                                                | 2005        | 98                              | 421                 | 64                          | 15.2             | 99.7                             |
| Tyldesley <sup>5</sup>                                                            | 2006        | 33                              | 93                  | 16                          | 17.2             | 97.8                             |
| Tandstad <sup>6</sup>                                                             | 2011        | 62                              | 512                 | 65                          | 12.7             | 99.8                             |
| Mortensen <sup>7</sup>                                                            | 2014        | 181                             | 1954                | 369                         | 18.9             | 99.3                             |
| Aparicio <sup>8</sup>                                                             | 2014        | 80                              | 744                 | 63                          | 11.1             | 100                              |
| Chung <sup>9</sup>                                                                | 2014        | 46                              | 685                 | 88                          | 12.8             | 99                               |
| Kollmannsberge <sup>10</sup>                                                      | 2015        | 52                              | 1344                | 173                         | 13               | 99.9                             |

| <b>Supplementary Table 3. Adjuvant radiation therapy studies in stage I seminoma</b> |                       |                     |                  |                                  |
|--------------------------------------------------------------------------------------|-----------------------|---------------------|------------------|----------------------------------|
| <b>Author</b>                                                                        | <b>Years of study</b> | <b>No. patients</b> | <b>Relapse %</b> | <b>Cause-specific survival %</b> |
| Fosså <sup>11</sup>                                                                  | 1989–1993             | 478                 | 3.8              | 100                              |
| Jones <sup>12</sup>                                                                  | 1995–1998             | 625                 | 3.5              | 99.6                             |
| Santoni <sup>13</sup>                                                                | 1970–1999             | 487                 | 4.3              | 99.4                             |
| Oliver <sup>14</sup>                                                                 | 1996–2001             | 904                 | 4.0              | 99.9                             |
| Tandstad <sup>6</sup>                                                                | 2000–2006             | 481                 | 0.8              | 99                               |
| Soper <sup>15</sup>                                                                  | 1990–2010             | 329                 | 2.8              | 99.3                             |
| Hosni <sup>16</sup>                                                                  | 1981–2011             | 294                 | 5.0              | 100                              |

*Hamilton RJ, et al. Canadian Urological Association consensus guideline: Management of testicular germ cell cancer*

| <b>Supplementary Table 4. Summary of surveillance studies in stage I non-seminoma</b> |                       |                     |                                 |                       |                     |              |
|---------------------------------------------------------------------------------------|-----------------------|---------------------|---------------------------------|-----------------------|---------------------|--------------|
| <b>Author (publication year)<br/>Site</b>                                             | <b>Years of study</b> | <b>No. patients</b> | <b>Median followup (months)</b> | <b>Relapses n (%)</b> | <b>Deaths n (%)</b> | <b>DSS %</b> |
| Divrik (2006) <sup>17</sup><br><i>Turkey</i>                                          | 1993–2005             | 211                 | 75                              | 66 (31)               | 5 (2)               | 98           |
| Daugaard (2003) <sup>18</sup><br><i>Denmark</i>                                       | 1984–2001             | 301                 | 60                              | 86 (29)               | 0 (0)               | 99           |
| Roeleveld (2001) <sup>19</sup><br><i>Netherlands</i>                                  | 1982–1994             | 90                  | 97                              | 23 (26)               | 1 (1)               | 99           |
| Alexandre (2001) <sup>20</sup><br><i>France</i>                                       | 1984–1996             | 88                  | 52                              | 24 (27)               | 1 (1)               | 98           |
| Francis (2000) <sup>21</sup><br><i>United Kingdom</i>                                 | 1979–1996             | 183                 | 70                              | 52 (28)               | 2 (1)               | 99           |
| Sogani (1998) <sup>22</sup><br><i>Memorial Sloan-Kettering Cancer Center, NY</i>      | 1979–1987             | 105                 | 136                             | 27 (26)               | 3 (3)               | 97           |
| Colls (1999) <sup>23</sup><br><i>New Zealand</i>                                      | 1980–1997             | 248                 | 53                              | 70 (28)               | 4 (2)               | 98           |
| Hao (1998) <sup>24</sup><br><i>Tom Baker Cancer Centre, Calgary</i>                   | 1980–1994             | 76                  | 49                              | 28 (37)               | 2 (3)               | 97           |
| Boyer (1997) <sup>25</sup><br><i>Australia</i>                                        | 1982–1995             | 77                  | 58                              | 27 (35)               | 2 (3)               | 97           |
| Nicolai (1995) <sup>26</sup><br><i>Milan</i>                                          | 1981–1984             | 85                  | 132                             | 25 (29)               | 3 (4)               | 96           |
| Gels (1995) <sup>27</sup><br><i>Groningen</i>                                         | 1982–1992             | 154                 | 84                              | 42 (27)               | 2 (1)               | 99           |
| Ondrus (1994) <sup>28</sup><br><i>Slovak Republic</i>                                 | 1984–1993             | 80                  | 83                              | 29 (36)               | 4 (5)               | 95           |
| Read (1992) <sup>29</sup><br><i>United Kingdom</i>                                    | 1984–1987             | 373                 | 60                              | 100 (27)              | 5 (1)               | 98           |
| Freedman (1987) <sup>30</sup><br><i>United Kingdom multicentre</i>                    | 1979–1983             | 259                 | 30                              | 70 (27)               | 3 (1)               | 98           |
| Maroto* (2005) <sup>31</sup><br><i>Spanish Germ Cell Group</i>                        | 1994–2004             | 358                 | 40                              | 71 (20)               | 5 (1.4)             | 95           |

*Hamilton RJ, et al. Canadian Urological Association consensus guideline: Management of testicular germ cell cancer*

|                                                                                                     |           |      |        |              |           |         |
|-----------------------------------------------------------------------------------------------------|-----------|------|--------|--------------|-----------|---------|
| Amato* (2004) <sup>32</sup><br><i>MD Anderson Cancer Center, Houston</i>                            | 1993–1999 | 23   | 38     | 3 (13)       | 0 (0)     | 100     |
| Ondrus* (1998) <sup>33</sup><br><i>Slovak Republic</i>                                              | 1992–1997 | 49   | 37     | 7 (14.3%)    | 0 (0)     | 100     |
| Pont* (1990) <sup>34</sup><br><i>Vienna</i>                                                         | 1985–1989 | 22   | 30     | 1 (4.5)      | 0 (0)     | 100     |
| Mortensen (2016) <sup>35</sup><br><i>Danish Testicular Cancer Study Group</i>                       | 1984–2007 | 1366 | 180    | 424 (31%)    | 15 (1.1%) | 98.2    |
| Lago-Hernandez (2015) <sup>36</sup><br><i>Dana-Farber Cancer Institute</i>                          | 1997–2013 | 135  | 48     | 50 (37%)     | 2 (1.5%)  | NR      |
| Kollmannsberger (2014) <sup>10</sup><br><i>Multinational cohort</i>                                 | 1998–2010 | 1139 | 62     | 221 (19%)    | 5 (0.4%)  | 99.4    |
| Kobayashi (2013) <sup>37</sup><br><i>Japan</i>                                                      | 1989–2008 | 36   | 99     | 9 (25%)      | 0 (0%)    | 100     |
| Tandstad (2009) <sup>38</sup><br><i>Sweden-Norway (Swedish-Norwegian Testicular Cancer Project)</i> | 1988–2005 | 350  | 56.4   | 44 (12.6%)   | 0 (0%)    | 99.9%   |
| Sturgeon (2011) <sup>39</sup><br><i>Princess Margaret</i>                                           | 1993–2005 | 371  | 75.6   | 104 (28%)    | 3 (0.8%)  | 99.1    |
| Pooled data                                                                                         | 1979–2013 | 6179 | 30–180 | 1603 (25.9%) | 67 (1.1%) | 95–100% |

\*Single-arm (surveillance) of risk-adapted study. DSS: disease-specific survival.



| <b>Supplementary Table 5. Adjuvant chemotherapy for stage I non-seminoma germ cell tumor (selected studies)</b> |                     |                            |                         |                                 |                       |
|-----------------------------------------------------------------------------------------------------------------|---------------------|----------------------------|-------------------------|---------------------------------|-----------------------|
| <b>Author (publication year)</b>                                                                                | <b>No. patients</b> | <b>Risk factors</b>        | <b>Regimen</b>          | <b>Median followup (months)</b> | <b>Relapses n (%)</b> |
| <b>Adjuvant chemotherapy with 2 cycles of cisplatin-based combination chemotherapy</b>                          |                     |                            |                         |                                 |                       |
| Cullen (1996) <sup>40</sup>                                                                                     | 114                 | EC, LVI, no yolk sac tumor | BE <sub>360</sub> P × 2 | 48                              | 2 (1.7)               |
| Pont (1996) <sup>41</sup>                                                                                       | 29                  | LVI                        | BEP × 2                 | 79                              | 2 (6.9)               |
| Chevreau (2004) <sup>42</sup>                                                                                   | 40                  | LVI, EC                    | BEP × 2                 | 113                             | 0 (0)                 |
| <b>Adjuvant chemotherapy with 1 cycle of cisplatin-based combination chemotherapy</b>                           |                     |                            |                         |                                 |                       |
| Tandstad (2009) <sup>38</sup>                                                                                   | 157                 | LVI                        | BEP × 1                 | 58                              | 5(3.2)                |
| Tandstad (2014) <sup>43</sup>                                                                                   | 258                 | LVI                        | BEP × 1                 | 95                              | 8 (3.2)               |
| Cullen (2020) <sup>44</sup>                                                                                     | 246                 | LVI                        | BEP X 1                 | 49                              | 7 (3.1)               |

| <b>Supplementary Table 6. Adjuvant RPLND in the management of stage I non-seminoma</b> |                       |                      |                 |                  |                       |                        |                                |                                               |
|----------------------------------------------------------------------------------------|-----------------------|----------------------|-----------------|------------------|-----------------------|------------------------|--------------------------------|-----------------------------------------------|
| <b>Author (publication year) Site</b>                                                  | <b>Years of study</b> | <b>Patients CS I</b> | <b>PS I (%)</b> | <b>PS II (%)</b> | <b>Relapse PS I %</b> | <b>Relapse PS II %</b> | <b>Adjuvant chemotherapy %</b> | <b>No. patients dead of testis cancer (%)</b> |
| Donohue (1993) <sup>45</sup><br><i>Indiana</i>                                         | 1979–1989             | 378                  | 266 (70)        | 112 (30)         | 12                    | 34                     | 13                             | 3 (0.8)                                       |
| Sweeney (2000) <sup>46</sup><br><i>Indiana</i>                                         | 1990–1995             | 292                  | 226 (77)        | 66 (22)          | 10                    | 22                     | 12                             | 1 (0.3)                                       |
| Nicolai (2004) <sup>47</sup><br><i>Milan</i>                                           | 1985–1995             | 322                  | 262 (80)        | 60 (20)          | NR                    | 27                     | NR                             | 4 (1.2)                                       |
| Stephenson (2005) <sup>48</sup>                                                        | 1989–2002             | 297                  | 214 (72)        | 83 (28)          | 6                     | 19                     | 15                             | 1 (0.3)                                       |

*Hamilton RJ, et al. Canadian Urological Association consensus guideline: Management of testicular germ cell cancer*

|                                                                              |           |             |             |            |      |       |      |         |
|------------------------------------------------------------------------------|-----------|-------------|-------------|------------|------|-------|------|---------|
| <i>MSKCC, NYC</i>                                                            |           |             |             |            |      |       |      |         |
| Spermon (2002) <sup>49</sup><br><i>Nijmegen</i>                              | 1982–1994 | 101         | 70 (69)     | 31 (31)    | 10   | 0     | 31   | 1 (1.0) |
| Weissbach (1990) <sup>50</sup><br><i>TTSB Bonn</i>                           | 1982–1987 | (CS1<br>NR) | 229         | NR         | 17   | NR    | NR   | 2       |
| Klepp* (1997) <sup>51</sup><br><i>SWENOTECA</i>                              | 1990–1994 | 99          | 85 (86)     | 14 (14)    | 18   | 0     | 14   | 0 (0)   |
| Albers** (2008) <sup>52</sup><br><i>German Testicular Cancer Study Group</i> | 1996–2005 | 173         | 141 (82)    | 32 (18)    | 9    | 0     | 18   | 0 (0)   |
| Poulakis (2006) <sup>53</sup><br><i>Germany</i>                              | 2001–2004 | 50          | 39 (78%)    | 11 (22%)   | 2    | 0     | 22   | 0 (0)   |
| Lv (2013) <sup>54</sup><br><i>China</i>                                      | 1997–2011 | 34          | 19 (66%)    | 15 (44%)   | 11.8 |       | 35   | 1 (2.9) |
| Dong (2013) <sup>55</sup><br><i>China</i>                                    | 1997–2009 | 30          | 27 (90%)    | 3 (10%)    | 0    | 0     | 10   | 0 (0)   |
| Hermans (2000) <sup>56</sup><br><i>Indiana</i>                               | 1990–1995 | 292         | 226 (77.4%) | 66 (22.6%) | 10.2 | 10.6  | 8.6  | N/A     |
| Pooled data                                                                  | 1979–2011 | 2068        | 77%         | 33%        | 9.6% | 11.3% | 17.9 | 0.65%   |

\*\*Single-arm of randomized trial.

*Hamilton RJ, et al. Canadian Urological Association consensus guideline: Management of testicular germ cell cancer*

| <b>Supplementary Table 7. Summary of randomized studies in advanced germ cell tumors</b> |             |  |                     |                                                   |                                                                               |
|------------------------------------------------------------------------------------------|-------------|--|---------------------|---------------------------------------------------|-------------------------------------------------------------------------------|
| <b>Author</b>                                                                            | <b>Year</b> |  | <b>No. patients</b> | <b>Treatment and cycles</b>                       | <b>Results:</b>                                                               |
| <b>Good-risk patients</b>                                                                |             |  |                     |                                                   |                                                                               |
| Bosl <sup>57</sup><br><i>United States</i>                                               | 1988        |  | 164                 | EP × 4<br>VAB-6 × 3                               | No difference<br>EP less toxic                                                |
| Einhorn <sup>58</sup><br><i>Indiana</i>                                                  | 1989        |  | 184                 | BEP × 3<br>BEP × 4                                | No difference<br>BEP × 3 less toxic                                           |
| de Wit <sup>59</sup><br><i>EORTC/MRC</i>                                                 | 2001        |  | 812                 | BEP × 3<br>BEP × 3, EP X1                         | No difference<br>BEP × 3 less toxic                                           |
| Toner <sup>60</sup><br><i>Australia/New Zealand</i>                                      | 2001        |  | 166                 | BE500P X 3<br>BE360PX4                            | BE500P superior OS                                                            |
| <b>Role of bleomycin</b>                                                                 |             |  |                     |                                                   |                                                                               |
| Levi <sup>61</sup><br><i>Australia</i>                                                   | 1993        |  | 218                 | PVB X 2-6<br>PV X 2-7                             | PVB:less<br>cancer deaths but more<br>toxicity deaths                         |
| Loehrer <sup>62</sup><br><i>ECOG</i>                                                     | 1995        |  | 171                 | BEP × 3<br>EP × 3                                 | BEP × 3 superior                                                              |
| de Wit <sup>63</sup><br><i>EORTC</i>                                                     | 1997        |  | 395                 | BE <sub>360</sub> P × 4<br>E <sub>360</sub> P × 4 | BE360P: RR higher                                                             |
| Culine <sup>64</sup><br><i>GETUG</i>                                                     | 2007        |  | 270                 | BEP × 3<br>EP × 4                                 | RR similar<br>BEP X 3: EFS and OS<br>underpowered but<br>nonsignificant trend |
| <b>Role of carboplatin (good risk)</b>                                                   |             |  |                     |                                                   |                                                                               |
| Bajorin <sup>65</sup><br><i>United States</i>                                            | 1993        |  | 265                 | EP × 4<br>E Carbo × 4                             | EP × 4 superior                                                               |
| Bokemeyer <sup>66</sup><br><i>Germany</i>                                                | 1996        |  | 54<br>NSGCT         | BE500P X 3<br>BE360Carbo X 4                      | BEP superior with<br>lower relapses                                           |
| Horwich <sup>67</sup><br><i>MRC/EORTC</i>                                                | 1997        |  | 598<br>NSGCT        | BE360P × 4<br>BE360Carbo × 4                      | BE <sub>360</sub> P × 4 superior                                              |
| Horwich <sup>68</sup><br><i>MRC</i>                                                      | 2000        |  | 130<br>SEMINOMA     | EP X 4<br>Carbo X 4                               | Closed early.<br>EP still standard                                            |
| <b>Intermediate- and poor-risk</b>                                                       |             |  |                     |                                                   |                                                                               |
| Williams <sup>69</sup><br><i>Indiana</i>                                                 | 1987        |  | 261                 | BEP X 4<br>PVB X 4                                | BEP is superior                                                               |
| Nichols <sup>70</sup>                                                                    | 1991        |  | 159                 | BEP X 4                                           | No difference                                                                 |

*Hamilton RJ, et al. Canadian Urological Association consensus guideline: Management of testicular germ cell cancer*

|                                                        |      |                         |                                              |                                                                    |
|--------------------------------------------------------|------|-------------------------|----------------------------------------------|--------------------------------------------------------------------|
| <i>SWOG/Southeastern Cancer Study Group</i>            |      |                         | BEP200 X 4                                   | BEP less toxic                                                     |
| De Wit <sup>71</sup><br><i>EORTC</i>                   | 1995 | 234                     | BEP X 4<br>PVB/BEP X4                        | No difference<br>BEP less toxic                                    |
| Nichols <sup>72</sup><br><i>ECOG/SWOG/CAL GB</i>       | 1998 | 286                     | BEP × 4<br>VIP × 4                           | No difference<br>BEP less toxic                                    |
| de Wit <sup>73</sup><br><i>EORTC</i>                   | 1998 | 84                      | BEP × 4<br>VIP × 4                           | No difference<br>BEP less toxic<br>(closed early)                  |
| Kaye <sup>74</sup><br><i>MRC/EORTC</i>                 | 1998 | 371                     | BEP X 4 + EP X2<br>BOP X 3+ VIPB<br>X 3      | No difference<br>BEP X 4 + EP X 2 less<br>toxic                    |
| Droz <sup>75</sup><br><i>GETUG</i>                     | 2007 | 115                     | BEPVin × 4<br>BEPVin + HDCT                  | No difference<br>BEPVin less toxic                                 |
| Motzer <sup>76</sup><br><i>MSKCC/ECOG/SW OG/CALGB</i>  | 2007 | 219                     | BEP × 4<br>BEP + HDCT                        | No difference<br>BEP less toxic                                    |
| Daugaard <sup>77</sup><br><i>EORTC/Germany/Spain</i>   | 2011 | 131                     | BEP X 4<br>VIPX 1 + HDCT<br>X 3              | No difference RR and<br>OS<br>HDCT: nonsignificant<br>trend in FFS |
| de Wit <sup>78</sup><br><i>EORTC/MRC/Germany/Spain</i> | 2012 | 337                     | BEP x 4<br>T-BEP x4                          | No difference<br>(closed early)                                    |
| Fizazi <sup>79</sup><br><i>GETUG/MDAnderson</i>        | 2014 | 263<br>(203 randomized) | BEP x 4<br>BEP X 1 + Dose<br>Dense Chemo X 4 | Dose dense superior in<br>PFS (primary endpoint),<br>not OS        |

#Dose-dense: BEP + paclitaxel+oxaliplatin X 2 cycles and then cisplatin+ ifosfamide+bleomycin X 2 cycles with G-CSF support. AGCTG: Australasian Germ Cell Trial Group; BECarbo: bleomycin, etoposide, and carboplatin; BEP: bleomycin, etoposide, cisplatin; BEPVin: bleomycin + etoposide + cisplatin + vinblastine; BOP: bleomycin, vincristine, cisplatin; cisplatin+VIP: cisplatin + ifosfamide + etoposide; dose-dense chemo: T-BEP+ Oxaliplatin X 2 then cisplatin, bleomycin ifosfamide X 2; ECarbo: etoposide and carboplatin; EORTC: European Organization for Research and Treatment of Cancer; EP: etoposide and cisplatin; EPVin: etoposide + cisplatin + vinblastine; FFS: failure-free survival; HDCT: high-dose chemotherapy; IGCCCG: International Germ Cell Consensus Classification; MRC: Medical Research Council; GTCG: German Testicular Cancer Group; MSKCC: Memorial Sloan-Kettering Cancer Center; OS: overall survival; PFS: progression-free survival; PVB: cisplatin , vinblastine, bleomycin; PV: vinblastine + cisplatin; RR: response rate; T-BEP: acitaxel+cisplatin+etoposide+bleomycin; VAB-6: vinblastine + bleomycin + cisplatin + cyclophosphamide + dactinomycin; VIP: etoposide ifosfamide cisplatin.

## References

1. Amin MB, Greene FL, Edge SB, et al. The eighth edition AJCC cancer staging manual: Continuing to build a bridge from a population-based to a more "personalized" approach to cancer staging. *Ca Cancer J Clin* 2017;67:93-9. <https://doi.org/10.3322/caac.21388>
2. Ramakrishnan S, Champion AE, Dorreen MS, et al. Stage I seminoma of the testis: Is post-orchidectomy surveillance a safe alternative to routine postoperative radiotherapy? *Clin Oncol* 1992;4:284-6. [https://doi.org/10.1016/S0936-6555\(05\)81100-8](https://doi.org/10.1016/S0936-6555(05)81100-8)
3. Hans von der M, Lena S, Krag J Grete, et al. Surveillance following orchidectomy for stage I seminoma of the testis [Internet]. *Eur J Cancer* 1993;29:1931-4. [https://doi.org/10.1016/0959-8049\(93\)90446-M](https://doi.org/10.1016/0959-8049(93)90446-M)
4. Warde P, Specht L, Horwich A, et al. Prognostic factors for relapse in stage I seminoma managed by surveillance: A pooled analysis. *J Clin Oncol* 2002;20:4448-52. <https://doi.org/10.1200/JCO.2002.01.038>
5. Tyldesley S, Voduc D, Mckenzie M, et al. Surveillance of stage I testicular seminoma: British Columbia Cancer Agency experience 1992–2002. *Urology* 2006;67:594-8. <https://doi.org/10.1016/j.urology.2005.09.050>
6. Tandstad T, Smaaland R, Solberg A, et al. Management of seminomatous testicular cancer: A binational, prospective, population-based study from the Swedish Norwegian testicular cancer study group. *J Clin Oncol* 2011;29:719-25. <https://doi.org/10.1200/JCO.2010.30.1044>
7. Mortensen MS, Lauritsen J, Gundgaard MG, et al. A nationwide cohort study of stage I seminoma patients followed on a surveillance program. *Eur Urol* 2014;66:1172-8. <https://doi.org/10.1016/j.eururo.2014.07.001>
8. Aparicio J, Maroto P, Muro XG del, et al. Prognostic factors for relapse in stage I seminoma: A new nomogram derived from three consecutive, risk-adapted studies from the Spanish Germ Cell Cancer Group (SGCCG). *Ann Oncol* 2014;25:2173-8. <https://doi.org/10.1093/annonc/mdu437>
9. Chung P, Daugaard G, Tyldesley S, et al. Evaluation of a prognostic model for risk of relapse in stage I seminoma surveillance. *Cancer Med* 2014;4:155-60. <https://doi.org/10.1002/cam4.324>
10. Kollmannsberger C, Tandstad T, Bedard PL, et al. Patterns of relapse in patients with clinical stage I testicular cancer managed with active surveillance. *J Clin Oncol* 2014;33:51-7. <https://doi.org/10.1200/JCO.2014.56.2116>
11. Fosså SD, Horwich A, Russell JM, et al. Optimal planning target volume for stage I testicular seminoma: A Medical Research Council randomized trial. Medical Research Council Testicular Tumor Working Group. *J Clin Oncol* 1999;17:1146. <https://doi.org/10.1200/JCO.1999.17.4.1146>
12. Jones WG, Fosså SD, Mead GM, et al. Randomized trial of 30 vs. 20 Gy in the adjuvant treatment of stage I testicular seminoma: A report on Medical Research Council Trial TE18, European Organization for the Research and Treatment of Cancer Trial 30942 (ISRCTN18525328). *J Clin Oncol* 2005;23:1200-8. <https://doi.org/10.1200/JCO.2005.08.003>
13. Santoni R, Barbera F, Bertoni F, et al. Stage I seminoma of the testis: A bi-institutional, retrospective analysis of patients treated with radiation therapy only. *BJU Int* 2003;92:47-

52. <https://doi.org/10.1046/j.1464-410X.2003.04273.x>
14. Oliver RTD, Mead GM, Rustin GJS, et al. Randomized trial of carboplatin vs. radiotherapy for stage I seminoma: Mature results on relapse and contralateral testis cancer rates in MRC TE19/EORTC 30982 study (ISRCTN27163214). *J Clin Oncol* 2011;29:957-62. <https://doi.org/10.1200/JCO.2009.26.4655>
15. Soper MS, Hastings JR, Cosmatos HA, et al. Observation vs. adjuvant radiation or chemotherapy in the management of stage I seminoma. *Am J Clin Oncol* 2014;37:356-9. <https://doi.org/10.1097/COC.0b013e318277d839>
16. Hosni A, Warde P, Jewett M, et al. Clinical characteristics and outcomes of late-relapse in stage I testicular seminoma. *Clin Oncol* 2016;28:648-54. <https://doi.org/10.1016/j.clon.2016.06.001>
17. Divrik RT, Akdoğan B, Özen H, et al. Outcomes of surveillance protocol of clinical stage I non-seminomatous germ cell tumors — is shift to risk-adapted policy justified? *J Urology* 2006;176:1424-30. <https://doi.org/10.1016/j.juro.2006.06.012>
18. Daugaard G, Petersen PM, Rørth M. Surveillance in stage I testicular cancer. *APMIS* 2003; 111:76-85. <https://doi.org/10.1034/j.1600-0463.2003.11101111.x>
19. Roeleveld TA, Horenblas S, Meinhardt W, et al. Surveillance can be the standard of care for stage I non-seminomatous testicular tumors and even high-risk patients. *J Urol* 2001;166:2166-70. [https://doi.org/10.1016/S0022-5347\(05\)65527-9](https://doi.org/10.1016/S0022-5347(05)65527-9)
20. Alexandre J, Fizazi K, Mahé C, et al: Stage I non-seminomatous germ cell tumors of the testis identification of a subgroup of patients with a very low risk of relapse. *Eur J Cancer* 2001;37:576-82. [https://doi.org/10.1016/S0959-8049\(00\)00442-1](https://doi.org/10.1016/S0959-8049(00)00442-1)
21. Francis R, Bower M, Brunström G, et al. Surveillance for stage I testicular germ cell tumors results and cost benefit analysis of management options. *Eur J Cancer* 2000;36:1925-32. [https://doi.org/10.1016/S0959-8049\(00\)00140-4](https://doi.org/10.1016/S0959-8049(00)00140-4)
22. Sogani PC, Perrotti M, Her HW, et al/ Clinical stage I testis cancer: Long-term outcome of patients on surveillance. *J Urol* 1998;159:855-8. [https://doi.org/10.1016/S0022-5347\(01\)63753-4](https://doi.org/10.1016/S0022-5347(01)63753-4)
23. Colls BM, Harvey VJ, Skelton L, et al. Late results of surveillance of clinical stage I non-seminoma germ cell testicular tumors: 17 years' experience in a national study in New Zealand. *BJU Int* 1999;83:76-82. <https://doi.org/10.1046/j.1464-410x.1999.00869.x>
24. Hao D, Seidel J, Brant R, et al. Compliance of clinical stage I non-seminomatous germ cell tumor patients with surveillance. *J Urol* 1998;160:768-71. [https://doi.org/10.1016/S0022-5347\(01\)62782-4](https://doi.org/10.1016/S0022-5347(01)62782-4)
25. Boyer MJ, Cox K, Tattersall MHN, et al. Active surveillance after orchiectomy for non-seminomatous testicular germ cell tumors: Late relapse may occur. *Urology* 1997;50:588-92. [https://doi.org/10.1016/S0090-4295\(97\)00301-4](https://doi.org/10.1016/S0090-4295(97)00301-4)
26. Nicola N, Giorgio P. A surveillance study of clinical stage I non-seminomatous germ cell tumors of the testis: 10-year followup. *J Urol* 1995;154:1045-9. [https://doi.org/10.1016/S0022-5347\(01\)66972-6](https://doi.org/10.1016/S0022-5347(01)66972-6)
27. Gels ME, Hoekstra HJ, Sleijfer DT, et al. Detection of recurrence in patients with clinical stage I non-seminomatous testicular germ cell tumors and consequences for further followup: A single-center, 10-year experience. *J Clin Oncol* 1995;13:1188-94. <https://doi.org/10.1200/JCO.1995.13.5.1188>
28. Ondruš D, Horňák M. Orchiectomy alone for clinical stage I non-seminomatous germ cell tumors of the testis (NSGCTT): A minimum followup period of 5 years. *Tumori J*

**Hamilton RJ, et al. Canadian Urological Association consensus guideline: Management of testicular germ cell cancer**

- 1994;80:362-4. <https://doi.org/10.1177/030089169408000510>
29. Read G, Stenning SP, Cullen MH, et al. Medical Research Council prospective study of surveillance for stage I testicular teratoma. Medical Research Council Testicular Tumors Working Party. *J Clin Oncol* 1992;10:1762-8. <https://doi.org/10.1200/JCO.1992.10.11.1762>
  30. Freedman L, Jones W, Peckham M, et al. Histopathology in the prediction of relapse of patients with stage I testicular teratoma treated by orchidectomy alone. *Lancet* 1987;330:294-8. [https://doi.org/10.1016/S0140-6736\(87\)90889-0](https://doi.org/10.1016/S0140-6736(87)90889-0)
  31. Maroto P, Muro XG del, Aparicio J, et al. Multicenter, risk-adapted management for stage I non-seminomatous germ cell tumors. *Ann Oncol* 2005;16:1915-20. <https://doi.org/10.1093/annonc/mdi397>
  32. Amato RJ, Ro JY, Ayala AG, et al. Risk-adapted treatment for patients with clinical stage I non-seminomatous germ cell tumor of the testis. *Urology* 2004;63:144-8. <https://doi.org/10.1016/j.urology.2003.08.045>
  33. Ondruš D, Mat'oška J, Belan V, et al. Prognostic factors in clinical stage I non-seminomatous germ cell testicular tumors: Rationale for different risk-adapted treatment. *Eur Urol* 1998;33:562-6. <https://doi.org/10.1159/000019656>
  34. Pont J, Hörtl W, Kosak D, et al. Risk-adapted treatment choice in stage I non-seminomatous testicular germ cell cancer by regarding vascular invasion in the primary tumor: A prospective trial. *J Clin Oncol* 1990;8:16-20. <https://doi.org/10.1200/JCO.1990.8.1.16>
  35. Mortensen MS, Lauritsen J, Kier MGG, et al. Late relapses in stage I testicular cancer patients on surveillance. *Eur Urol* 2016;70:365-71. <https://doi.org/10.1016/j.eururo.2016.03.016>
  36. Lago-Hernandez CA, Feldman H, O'Donnell E, et al. A refined risk stratification scheme for clinical stage I NSGCT based on evaluation of both embryonal predominance and lymphovascular invasion. *Ann Oncol* 2015;26:1396-1401. <https://doi.org/10.1093/annonc/mdv180>
  37. Kobayashi K, Saito T, Kitamura Y, et al. Oncological outcomes in patients with stage I testicular seminoma and non-seminoma: Pathological risk factors for relapse and feasibility of surveillance after orchiectomy. *Diagn Pathol* 2013;8:57. <https://doi.org/10.1186/1746-1596-8-57>
  38. Tandstad T, Dahl O, Cohn-Cedermark G, et al. Risk-adapted treatment in clinical stage I non-seminomatous germ cell testicular cancer: The SWENOTECA Management Program. *J Clin Oncol* 2009;27:2122-8. <https://doi.org/10.1200/JCO.2008.18.8953>
  39. Sturgeon JF, Moore MJ, Kakiashvili DM, et al. Non-risk-adapted surveillance in clinical stage I non-seminomatous germ cell tumors: The Princess Margaret Hospital's experience. *Eur Urol* 2011;59:556-62. <https://doi.org/10.1016/j.eururo.2010.12.010>
  40. Cullen MH, Stenning SP, Parkinson MC, et al. Short-course adjuvant chemotherapy in high-risk stage I non-seminomatous germ cell tumors of the testis: A Medical Research Council report. *J Clin Oncol* 1996;14:1106-13. <https://doi.org/10.1200/JCO.1996.14.4.1106>
  41. Pont J, Albrecht W, Postner G, et al. Adjuvant chemotherapy for high-risk clinical stage I non-seminomatous testicular germ cell cancer: Long-term results of a prospective trial. *J Clin Oncol* 1996;14:441-8. <https://doi.org/10.1200/JCO.1996.14.2.441>
  42. Chevreau C, Mazerolles C, Soulié M, et al. Long-term efficacy of two cycles of BEP

- regimen in high-risk stage I non-seminomatous testicular germ cell tumors with embryonal carcinoma and/or vascular invasion. *Eur Urol* 2004;46:209-15. <https://doi.org/10.1016/j.eururo.2004.03.022>
43. Tandstad T, Ståhl O, Håkansson U, et al. One course of adjuvant BEP in clinical stage I non-seminoma mature and expanded results from the SWENOTECA group. *Ann Oncol* 2014;25:2167-72. <https://doi.org/10.1093/annonc/mdu375>
44. Cullen M, Huddart R, Joffe J, et al. The 111 study: A single-arm, phase 3 trial evaluating one cycle of bleomycin, etoposide, and cisplatin as adjuvant chemotherapy in high-risk, stage I non-seminomatous or combined germ cell tumors of the testis. *Eur Urol* 2020;77:344-51. <https://doi.org/10.1016/j.eururo.2019.11.022>
45. Donohue JP, Thornhill JA, Foster RS, et al. Retroperitoneal lymphadenectomy for clinical stage A testis cancer (1965–1989): Modifications of technique and impact on ejaculation. *J Urol* 1993;149:237-43. [https://doi.org/10.1016/S0022-5347\(17\)36046-9](https://doi.org/10.1016/S0022-5347(17)36046-9)
46. Sweeney CJ, Hermans BP, Heilman DK, et al. Results and outcome of retroperitoneal lymph node dissection for clinical stage I embryonal carcinoma — predominant testis cancer. *J Clin Oncol* 2000;18:358-62. <https://doi.org/10.1200/JCO.2000.18.2.358>
47. Nicolai N, Miceli R, Artusi R, et al. A simple model for predicting nodal metastasis in patients with clinical stage I non-seminomatous germ cell testicular tumors undergoing retroperitoneal lymph node dissection only. *J Urol* 2004;171:172-6. <https://doi.org/10.1097/01.ju.0000101513.64777.f2>
48. Stephenson AJ, Bosl GJ, Bajorin D, et al. Retroperitoneal lymph node dissection in patients with low stage testicular cancer with embryonal carcinoma predominance and/or lymphovascular invasion. *J Urol* 2005;174:557-60. <https://doi.org/10.1097/01.ju.0000165163.03805.37>
49. Spermon JR, Roeleveld TA, Poel HG van der, et al. Comparison of surveillance and retroperitoneal lymph node dissection in stage I non-seminomatous germ cell tumors. *Urology* 2002;59:923-9. [https://doi.org/10.1016/S0090-4295\(02\)01528-5](https://doi.org/10.1016/S0090-4295(02)01528-5)
50. Weissbach L, Boedefeld EA, Horstmann-Dubral B. Surgical treatment of stage-I non-seminomatous germ cell testis tumor. *Eur Urol* 1990;17:97-106. <https://doi.org/10.1159/000464015>
51. Klepp O, Dahl O, Flodgren P, et al. Risk-adapted treatment of clinical stage I non-seminoma testis cancer. *Eur J Cancer* 1997;33:1038-44. [https://doi.org/10.1016/S0959-8049\(97\)00041-5](https://doi.org/10.1016/S0959-8049(97)00041-5)
52. Albers P, Siener R, Krege S, et al. Randomized, phase 3 trial comparing retroperitoneal lymph node dissection with one course of bleomycin and etoposide plus cisplatin chemotherapy in the adjuvant treatment of clinical stage I non-seminomatous testicular germ cell tumors: AUO trial AH 01/94 by the German Testicular Cancer Study Group. *J Clin Oncol* 2008;26:2966-72. <https://doi.org/10.1200/JCO.2007.12.0899>
53. Poulakis V, Skriapas K, Vries R de, et al. Quality of life after laparoscopic and open retroperitoneal lymph node dissection in clinical stage I non-seminomatous germ cell tumor: A comparison study. *Urology* 2006;68:154-60. <https://doi.org/10.1016/j.urology.2006.01.023>
54. Lv Z-J, Wu S, Dong P, et al. Clinical outcomes in patients with stage I non-seminomatous germ cell cancer. *Asian J Androl* 2013;15:558-63. <https://doi.org/10.1038/aja.2013.16>
55. Dong P, Liu Z-W, Li X-D, et al. Risk factors for relapse in patients with clinical stage I



**Hamilton RJ, et al. Canadian Urological Association consensus guideline: Management of testicular germ cell cancer**

- testicular non-seminomatous germ cell tumors. *Med Oncol* 2013;30:494.  
<https://doi.org/10.1007/s12032-013-0494-y>
56. Hermans BP, Sweeney CJ, Foster RS, et al. Risk of systemic metastases in clinical stage I non-seminoma germ cell testis tumor managed by retroperitoneal lymph node dissection. *J Urol* 2000;163:1721-4. [https://doi.org/10.1016/S0022-5347\(05\)67528-3](https://doi.org/10.1016/S0022-5347(05)67528-3)
  57. Bosl GJ, Geller NL, Bajorin D, et al. A randomized trial of etoposide + cisplatin vs. vinblastine + bleomycin + cisplatin + cyclophosphamide + dactinomycin in patients with good-prognosis germ cell tumors. *J Clin Oncol* 1988;6:1231-8.  
<https://doi.org/10.1200/JCO.1988.6.8.1231>
  58. Einhorn LH, Williams SD, Loehrer PJ, et al. Evaluation of optimal duration of chemotherapy in favorable-prognosis disseminated germ cell tumors: A Southeastern Cancer Study Group protocol. *J Clin Oncol* 1989;7:387-91.  
<https://doi.org/10.1200/JCO.1989.7.3.387>
  59. Wit R de, Roberts JT, Wilkinson PM, et al. Equivalence of three or four cycles of bleomycin, etoposide, and cisplatin chemotherapy and of a 3- or 5-day schedule in good-prognosis germ cell cancer: A randomized study of the European Organization for Research and Treatment of Cancer Genitourinary Tract Cancer Cooperative Group and the Medical Research Council. *J Clin Oncol* 2001;19:1629-40.  
<https://doi.org/10.1200/JCO.2001.19.6.1629>
  60. Toner G, Stockler M, Boyer M, et al. Comparison of two standard chemotherapy regimens for good-prognosis germ-cell tumors: A randomized trial. *Lancet* 2001;357:739-45. [https://doi.org/10.1016/S0140-6736\(00\)04165-9](https://doi.org/10.1016/S0140-6736(00)04165-9)
  61. Levi JA, Raghavan D, Harvey V, et al. The importance of bleomycin in combination chemotherapy for good-prognosis germ cell carcinoma. Australasian Germ Cell Trial Group. *J Clin Oncol* 1993;11:1300-5. <https://doi.org/10.1200/JCO.1993.11.7.1300>
  62. Loehrer PJ, Johnson D, Elson P, et al. Importance of bleomycin in favorable-prognosis disseminated germ cell tumors: An Eastern Cooperative Oncology Group trial. *J Clin Oncol* 1995;13:470-6. <https://doi.org/10.1200/JCO.1995.13.2.470>
  63. Wit R de, Stoter G, Kaye SB, et al. Importance of bleomycin in combination chemotherapy for good-prognosis testicular non-seminoma: A randomized study of the European Organization for Research and Treatment of Cancer Genitourinary Tract Cancer Cooperative Group. *J Clin Oncol* 1997;15:1837-43.  
<https://doi.org/10.1200/JCO.1997.15.5.1837>
  64. Culine S, Kerbrat P, Kramar A, et al. Refining the optimal chemotherapy regimen for good-risk metastatic non-seminomatous germ-cell tumors: A randomized trial of the Genito-Urinary Group of the French Federation of Cancer Centers (GETUG T93BP). *Ann Oncol* 2007;18:917-24. <https://doi.org/10.1093/annonc/mdm062>
  65. Bajorin DF, Sarosdy MF, Pfister DG, et al. Randomized trial of etoposide and cisplatin vs. etoposide and carboplatin in patients with good-risk germ cell tumors: A multi-institutional study. *J Clin Oncol* 1993;11:598-606.  
<https://doi.org/10.1200/JCO.1993.11.4.598>
  66. Bokemeyer C, Köhrmann O, Tischler J, et al. A randomized trial of cisplatin, etoposide and bleomycin (PEB) vs. carboplatin, etoposide and bleomycin (CEB) for patients with 'good-risk' metastatic non-seminomatous germ cell tumors. *Ann Oncol* 1996;7:1015-21.  
<https://doi.org/10.1093/oxfordjournals.annonc.a010493>
  67. Horwich A, Sleijfer DT, Fosså SD, et al. Randomized trial of bleomycin, etoposide, and

**Hamilton RJ, et al. Canadian Urological Association consensus guideline: Management of testicular germ cell cancer**

- cisplatin compared with bleomycin, etoposide, and carboplatin in good-prognosis metastatic non-seminomatous germ cell cancer: A Multi-institutional Medical Research Council/European Organization for Research and Treatment of Cancer trial. *J Clin Oncol* 1997;15:1844-52. <https://doi.org/10.1200/JCO.1997.15.5.1844>
68. Horwich A, Oliver RT, Wilkinson PM, et al. A Medical Research Council randomized trial of single agent carboplatin vs. etoposide and cisplatin for advanced metastatic seminoma. *Brit J Cancer* 2000;83:1623-9. <https://doi.org/10.1054/bjoc.2000.1498>
  69. Williams SD, Birch R, Einhorn LH, et al. Treatment of disseminated germ cell tumors with cisplatin, bleomycin, and either vinblastine or etoposide. *N Engl J Med* 1987;316:1435-40. <https://doi.org/10.1056/NEJM198706043162302>
  70. Nichols CR, Williams SD, Loehrer PJ, et al. Randomized study of cisplatin dose intensity in poor-risk germ cell tumors: A Southeastern Cancer Study Group and Southwest Oncology Group protocol. *J Clin Oncol* 1991;9:1163-72. <https://doi.org/10.1200/JCO.1991.9.7.1163>
  71. Wit R de, Stoter G, Sleijfer DT, et al. Four cycles of BEP versus an alternating regime of PVB and BEP in patients with poor-prognosis metastatic testicular non-seminoma: A randomized study of the EORTC Genitourinary Tract Cancer Cooperative Group. *Brit J Cancer* 1995;71:1311-4. <https://doi.org/10.1038/bjc.1995.254>
  72. Nichols CR, Catalano PJ, Crawford ED, et al. Randomized comparison of cisplatin and etoposide and either bleomycin or ifosfamide in treatment of advanced disseminated germ cell tumors: An Eastern Cooperative Oncology Group, Southwest Oncology Group, and Cancer and Leukemia Group B Study. *J Clin Oncol* 1998;16:1287-93. <https://doi.org/10.1200/JCO.1998.16.4.1287>
  73. Wit R de, Stoter G, TSleijfer D, et al. Four cycles of BEP vs. four cycles of VIP in patients with intermediate-prognosis metastatic testicular non-seminoma: A randomized study of the EORTC Genitourinary Tract Cancer Cooperative Group. *Brit J Cancer* 1998;78:828-32. <https://doi.org/10.1038/bjc.1998.587>
  74. Kaye SB, Mead GM, Fossa S, et al. Intensive induction-sequential chemotherapy with BOP/VIP-B compared with treatment with BEP/EP for poor-prognosis metastatic non-seminomatous germ cell tumor: A Randomized Medical Research Council/European Organization for Research and Treatment of Cancer study. *J Clin Oncol* 1998;16:692-701. <https://doi.org/10.1200/JCO.1998.16.2.692>
  75. Droz J-P, Kramar A, Biron P, et al. Failure of high-dose cyclophosphamide and etoposide combined with double-dose cisplatin and bone marrow support in patients with high-volume metastatic non-seminomatous germ-cell tumors: Mature results of a randomized trial. *Eur Urol* 2007;51:739-48. <https://doi.org/10.1016/j.eururo.2006.10.035>
  76. Motzer RJ, Nichols CJ, Margolin KA, et al. Phase 3, randomized trial of conventional-dose chemotherapy with or without high-dose chemotherapy and autologous hematopoietic stem-cell rescue as first-line treatment for patients with poor-prognosis metastatic germ cell tumors. *J Clin Oncol* 1007;25:247-56. <https://doi.org/10.1200/JCO.2005.05.4528>
  77. Daugaard G, Skoneczna I, Aass N, et al. A randomized, phase 3 study comparing standard-dose BEP with sequential high-dose cisplatin, etoposide, and ifosfamide (VIP) plus stem-cell support in males with poor-prognosis germ cell cancer. An intergroup study of EORTC, GTCSSG, and Grupo Germinal (EORTC 30974). *Ann Oncol* 2011;22:1054-61. <https://doi.org/10.1093/annonc/mdq575>

***Hamilton RJ, et al. Canadian Urological Association consensus guideline: Management of testicular germ cell cancer***

78. Wit R de, Skoneczna I, Daugaard G, et al. Randomized, phase 3 study comparing paclitaxel-bleomycin, etoposide, and cisplatin (BEP) to standard BEP in intermediate-prognosis germ cell cancer: Intergroup study EORTC 30983. *J Clin Oncol* 2012;30:792-9. <https://doi.org/10.1200/JCO.2011.37.0171>
79. Fizazi K, Pagliaro L, Laplanche A, et al, Personalized chemotherapy based on tumor marker decline in poor prognosis germ cell tumors (GETUG 13): A phase 3, multicenter, randomized trial. *Lancet Oncol* 2014;15:1442-50. [https://doi.org/10.1016/S1470-2045\(14\)70490-5](https://doi.org/10.1016/S1470-2045(14)70490-5)
